21 Severe acute respiratory syndrome coronavirus 2 (SARS-CoV-2) is responsible for the  
22 COVID-19 pandemic, causing health and economic problems. Currently, as dangerous  
23 mutations emerge there is an increased demand for specific treatments for SARS-CoV-2  
24 infected patients. The spike glycoprotein on the virus membrane binds to the angiotensin  
25 converting enzyme 2 (ACE2) receptor on host cells through its receptor binding domain  
26 (RBD) to mediate virus entry. Thus, blocking this interaction may inhibit viral entry and  
27 consequently stop infection. Here, we generated fusion proteins composed of the  
28 extracellular portions of ACE2 and RBD fused to the Fc portion of human IgG1 (ACE2-  
29 Ig and RBD-Ig, respectively). We demonstrate that ACE2-Ig is enzymatically active and  
30 that it can be recognized by the SARS-CoV-2 RBD, independently of its enzymatic  
31 activity. We further show that RBD-Ig efficiently inhibits *in vitro* and *in vivo* SARS-  
32 CoV-2 infection, better than ACE2-Ig. Mechanistically we show that anti-spike  
33 antibodies generation, ACE2 enzymatic activity and ACE2 surface expression were not  
34 affected by RBD-Ig. Finally, we show that RBD-Ig is more efficient than ACE2-Ig at  
35 neutralizing high virus concentration infection. We thus propose that RBD-Ig physically  
36 blocks virus infection by binding to ACE2 and that RBD-Ig should be used for the  
37 treatment of SARS-CoV-2-infected patients.

### 38 **Author Summary**

39 SARS-CoV-2 infection caused serious socio-economic and health problems around the  
40 globe. As dangerous mutations emerge, there is an increased demand for specific  
41 treatments for SARS-CoV-2 infected patients. SARS-CoV-2 infection starts via binding  
42 of SARS-CoV-2 spike protein receptor binding domain (RBD) to its receptor, ACE2, on  
43 host cells. To intercept this binding, we generated Ig-fusion proteins. ACE2-Ig was

44 generated to possibly block RBD by binding to it and RBD-Ig to block ACE2. We indeed  
45 showed that the fusion proteins bind to their respective target. We found that it is more  
46 efficient to inhibit SARS-CoV-2 infection by blocking ACE2 receptor with RBD-Ig. We  
47 also showed that RBD-Ig does not interfere with ACE2 activity or surface expression.  
48 Importantly, as our treatment does not target the virus directly, it may be efficient against  
49 any emerging variant. We propose here that RBD-Ig physically blocks virus infection by  
50 binding to ACE2 and thus it may be used for the treatment of SARS-CoV-2-infected  
51 patients.

52

53 **Main text**

54 **Introduction**

55 SARS-CoV-2 was first reported in December 2019 in China. It is a highly contagious  
56 virus which had caused worldwide socio-economic, political, and environmental  
57 problems [1]. In an attempt to stop the pandemic, the FDA first issued an emergency use  
58 authorization for Pfizer [2] and Moderna [3] vaccines, followed by Ad26.COV2.S [4] .  
59 Both vaccines, The Pfizer vaccine called BNT162b2 [5], and Moderna vaccine called  
60 mRNA-1273 [6], are composed of a lipid-nanoparticle (LNP)-encapsulated mRNA  
61 expressing the prefusion-stabilized spike glycoprotein. However, a treatment that will  
62 inhibit virus infection is urgently needed because not all individuals will be vaccinated,  
63 and even in those that will, the vaccines are not 100% effective. Furthermore, lately  
64 dangerous virus mutants appeared which may affect vaccine efficiency [7].  
65 To infect cells, the spike glycoprotein, located on SARS-CoV-2 envelope, binds to the  
66 ACE2 receptor found on host cells [8]. The spike protein is trimeric, where each  
67 monomer contains two subunits: S1 and S2, which mediate attachment and membrane  
68 fusion, respectively. S1 itself can be subdivided further into S1a and S1b, where the latter  
69 includes the RBD [9]. The virus binds primarily to ACE2 receptors on type 2  
70 pneumocytes [10], thus it mainly targets the lungs, but as ACE2 is present on many other  
71 cells, it is also capable of causing damage to other organs such as the heart, the liver, the  
72 kidneys, blood and immune system [11]. ACE2 is a carboxypeptidase of the renin-  
73 angiotensin hormone system that is a critical regulator of blood volume, systemic  
74 vascular resistance, and thus cardiovascular homeostasis [12]. ACE2 converts  
75 angiotensin I to angiotensin 1-9, a peptide with anti-hypertrophic effects in

76 cardiomyocytes [13], and angiotensin II to angiotensin 1-7, which acts as a vasodilator  
77 [14].

78 SARS-CoV-2 life cycle starts with its RBD binding to the ACE2 receptor and ends by  
79 release of virions which binds to ACE2 receptors elsewhere [10]. Thus, intercepting the  
80 binding of the virions to the ACE2 receptor may help to treat infection. Developing  
81 treatment for SARS-CoV-2 infection is especially important since the FDA has yet  
82 approved any specific treatment for SARS-CoV-2 infected patients [15].

83 To intercept SARS-CoV-2 RBD binding to ACE2 we have generated fusion proteins  
84 containing the extracellular portions of RBD and ACE2 which are fused to the Fc portion  
85 of human IgG1. We have chosen this approach since the Fc partner increases the half-life  
86 of the protein and enables efficient purification [16]. Indeed, using the IgG Fc as a fusion  
87 partner to significantly increase the half-life of a therapeutic peptide or protein was first  
88 described in 1989 [17]. Since then, Fc- fusion proteins have been investigated for their  
89 effectiveness to treat many pathologies. Most Fc- fusions target receptor- ligand  
90 interactions and thus are used as antagonists to block receptor binding (e.g. Etanercept,  
91 Aflibercept, Riloncept, Belatacept, Abatacept) [18]. It has been shown that soluble  
92 extracellular domains of ACE2 can act as a decoy, competitive inhibitors for SARS-CoV-  
93 2 infection [19,20]. RBD-Ig, on the other hand was tested only as a preventive vaccine  
94 against SARS-CoV-2 and not as a possible treatment during active infection [21,22].

95 Taken together, we decided to assess whether fusion proteins consisting of either ACE2  
96 or RBD could potentially serve as therapeutics for treating active SARS-CoV-2 infection.  
97 Importantly, we demonstrate both in vitro and in vivo that RBD-Ig is more efficient than  
98 ACE2-Ig in its ability to inhibit SARS-CoV-2 infection. We demonstrated that RBD-Ig

99 binding to ACE2 does not interfere with its expression on the cell surface or with its  
100 enzymatic activity and suggest that RBD-Ig inhibits SARS-CoV-2 infection by physically  
101 interacting with ACE2.

102

## 103 **Results**

### 104 **Generation of ACE2-Ig and RBD-Ig**

105 Since binding of SARS-CoV-2 RBD to ACE2 on host cells mediates virus infection ([8]  
106 and Figure 1A, left), we decided to intercept this binding. For that, we generated fusion  
107 proteins composed of the extracellular portions of human ACE2 or the viral RBD fused  
108 to the Fc portion of human IgG1. These fusion proteins are expected to inhibit SARS-  
109 CoV-2 infection by either blocking SARS-CoV-2 spike protein with ACE2-Ig (Figure  
110 1A, middle) or by blocking ACE2 on host cells with RBD-Ig (Figure 1A, left).

111 To investigate whether the RBD-Ig we have generated can indeed bind to ACE2, we  
112 expressed ACE2 with an N-terminal flag-tag in 293T cells (293T-ACE2). Expression of  
113 ACE2 was verified by flow cytometry using an anti-flag antibody (Figure 1B). We then  
114 stained 293T-ACE2 cells with RBD-Ig and demonstrated that RBD-Ig binds to these  
115 cells, but not to the parental 293T cells (Figure 1C).

116 Next, to investigate the ability of ACE2-Ig to bind SARS-CoV-2 spike protein, we co-  
117 transfected 293T cells with SARS-CoV-2 spike envelope plasmid, a packaging plasmid  
118 and a GFP plasmid (293T-Spike). As a control we co-transfected 293T cells with a VSV-  
119 G envelope plasmid, a packaging plasmid and a GFP plasmid (293T-VSV-G). Staining  
120 was performed on GFP-positive gated cells. As can be seen, the 293T-Spike cells express  
121 high levels of the spike protein (Figure 1D, left), and were specifically recognized by

122 ACE2-Ig. As expected, ACE2-Ig did not bind to the 293T-VSV-G cells (Figure 1D,  
123 right).

### 124 **ACE2 enzymatic activity is not required for its binding to SARS-CoV-2 spike** 125 **protein**

126 After confirming the binding of the fusion proteins to their respective targets, we wanted  
127 to check if ACE2-Ig is enzymatically active since enzymatic activity of ACE2 might be  
128 important for the course of COVID-19 disease [23,24]. To test the enzymatic activity, we  
129 used a commercial kit detailed in the “Methods” section. As can be seen in Figure 2A,  
130 ACE2-Ig was as active as human recombinant ACE2. Furthermore, the enzymatic  
131 activity of both proteins was completely abolished in presence of an ACE2 inhibitor  
132 (Figure 2A). After assessing ACE2-Ig activity, we wanted to test whether the enzymatic  
133 activity of ACE2 is required for its recognition by the SARS-CoV-2 spike protein. For  
134 that, we stained 293T-spike cells with ACE2-Ig in the presence or absence of an ACE2  
135 inhibitor. We used a concentration of ACE2-Ig at which complete inhibition of enzymatic  
136 activity was achieved in the presence of the inhibitor (Figure 2A). As can be seen, no  
137 difference in ACE2-Ig binding was observed, regardless of whether the inhibitor was  
138 present or not (Figure 2B). Thus, we concluded that ACE2-Ig binding to SARS-CoV-2  
139 spike protein is not dependent on its enzymatic activity.

### 140 **RBD-Ig and ACE2-Ig inhibit SARS-CoV-2 infection in vitro**

141 Next, we wanted to test whether in vitro SARS-CoV-2 infection can be inhibited by  
142 ACE2-Ig or RBD-Ig. To this end, we performed a plaque reduction neutralization test  
143 (PRNT), using Vero E6 cells that are permissive to SARS-CoV-2 infection [25]. Our  
144 negative control throughout these assays was a control fusion protein (Control-Ig). To

145 assess inhibition by ACE2-Ig we initially incubated increasing concentration of the  
146 fusion protein with 300 PFU/ml of SARS-CoV-2 for 1 hour at 37°C, and then infected  
147 Vero E6 cells. Conversely, to test for inhibition by RBD-Ig, we had to first incubate the  
148 fusion protein with Vero E6 cells for 1 hour at 37°C, and then infect with 300 PFU/ml of  
149 SARS-CoV-2. Both strategies required a 48-hour incubation period to allow for plaque  
150 formation, followed by counting of said plaques and calculation of neutralization  
151 percentage. While the Control-Ig had no neutralizing effect in any of the concentrations  
152 tested, a dose-dependent neutralization of virus infection was observed for ACE2-Ig  
153 (Figure 2C), as well as for RBD-Ig (Figure 2D). When comparing between RBD-Ig and  
154 ACE2-Ig neutralization efficiency, RBD-Ig was significantly more efficient at the highest  
155 concentration used. When 50 ug/ml of RBD-Ig was applied, ~75% neutralization was  
156 observed ( $p=0.001$ ) as compared to ~60% neutralization by ACE2-Ig. These results  
157 suggest that RBD-Ig inhibits in vitro infection to a greater degree.

158

### 159 **RBD-Ig efficiently inhibits SARS-CoV-2 infection in vivo**

160 As RBD-Ig was more efficient than ACE2-Ig in vitro we wanted to further examine the  
161 fusion proteins efficiency in vivo. For that purpose, we infected homozygous female  
162 K18-hACE2 transgenic mice [26] by inhalation of 200 PFU of SARS-CoV-2. As a  
163 control for the infection, we looked at naïve (uninfected and untreated) mice. We also had  
164 a control for the treatment which included infected mice treated with an unrelated fusion  
165 protein (Control-Ig). The experiments lasted 15 days, during 1-5 days post-infection (dpi)



166 the mice were injected three times intraperitoneally with 75ug of either RBD-Ig, ACE2-  
167 Ig, or Control-Ig. Treatments started 24 hours following infection .  
168 Mice from the Control-Ig treated group started dying or losing more than 30% of their  
169 initial body weight (which is considered non ethical) at 7 dpi and we therefore could no  
170 longer use weight loss to assess the efficacy of our treatment. Thus, percentage of initial  
171 body weight was calculated until 7 dpi (Figure 3A). All SARS-CoV-2 infected mice  
172 started to lose weight at around 4 dpi. At 6-7 dpi the mice treated with RBD-Ig showed  
173 significantly less weight loss, as compared to all other infected groups (Figure 3A). We  
174 also monitored mice survival. Importantly, while the infected mice groups treated with  
175 Control-Ig or ACE2-Ig showed ~20% survival, the RBD-Ig treated group had  
176 significantly higher percentage with 50% survival (Figure 3B).

#### 177 **All infected mice generate neutralizing anti-Spike antibodies**

178 Finally, we wanted to investigate why the ACE2-Ig fusion protein was less effective than  
179 RBD-Ig, both in vitro (Figure 2) and in vivo (Figure 3). We therefore evaluated anti-spike  
180 and anti-ACE2 IgG antibody generation in all mice groups. For that, sera were collected  
181 at 15 dpi from all mice groups including naïve mice and various sera dilutions were used  
182 to stain 293T-Spike cells and 293T-ACE2 cells to assess antibody existence and quantity  
183 by flow cytometry (Figure 4A). To our surprise, an equivalent, dose-dependent staining  
184 of all 293T-Spike cells was observed with sera obtained from all infected and treated  
185 mice (Figure 4A). As expected, no staining was observed when sera of naïve uninfected  
186 mice were used (Figure 4A) or when the sera from all mice groups were used to stain the  
187 293T-ACE2 cells (Figure 4A). Thus, we concluded that the quantity of antibodies  
188 generated is not the reason for why RBD-Ig is more efficient. We then wanted to check

189 the quality of the antibodies, as we suspected that RBD-Ig treated mice will generate  
190 more neutralizing antibodies since it was shown that anti-RBD antibodies have  
191 neutralization effect [27]. To test this hypothesis, we used the 293T-Spike cells and  
192 stained them with ACE2-Ig in the presence or absence of sera obtained from all mice  
193 groups. Since naïve mice did not generate anti-spike antibodies (Figure 4A), their sera, as  
194 expected, did not contained neutralizing antibodies. Indeed, similar ACE2-Ig binding was  
195 observed with and without blocking (Figure 4B). In all the infected mice, a comparable  
196 level of blocking was seen with sera regardless of the treatment administered, as assessed  
197 by reduced ACE2-Ig staining (Figure 4B). From these results we concluded that all the  
198 antibodies that were generated were a result of SARS-CoV-2 infection rather than our  
199 treatment.

#### 200 **SARS-CoV-2 infection is possibly inhibited via physical blockade of ACE2 by RBD-** 201 **Ig**

202 To further investigate why is RBD-Ig better than ACE2-Ig at inhibiting SARS-CoV-2  
203 infection we first generated a specific monoclonal antibody against ACE2 using ACE2-Ig  
204 as an antigen. This step was essential since the commercial antibodies (#ABIN1169449  
205 and #MA5-32307) we tested did not recognize ACE2 effectively. As can be seen in  
206 Figure 5A, our generated antibody (anti-ACE2 01) is specific to ACE2, as it binds only to  
207 the 293T-ACE2 cells. To test if the antibody blocks the interaction with SARS-CoV-2  
208 RBD, we incubated the antibody with 293T-ACE2 cells for 1 hour and then stained the

209 cells with RBD-Ig. The anti-ACE2 01 antibody has no blocking property as its presence  
210 did not interfere with the binding of RBD-Ig to the ACE2 (Figure 5B).

211 We then analyzed whether the expression of ACE2 is altered, at various time points,  
212 following SARS-CoV-2 infection. We infected 293T-ACE2 cells with a 0.5 MOI and  
213 compared between ACE2 surface expression on infected cells to uninfected cells using  
214 our anti-ACE2 01 antibody. Cells were harvested at 16-, 24- and 48-hour post-infection  
215 and SARS-CoV-2 spike surface expression was assessed by flow cytometry to verify  
216 infection. Infected cells indeed expressed SARS-CoV-2 spike protein while uninfected  
217 cells did not (Figure 5C, left). Little or no change in ACE2 surface expression was  
218 noticed at all the time points (Figure 5C, right), indicating that ACE2 surface levels are  
219 not subjected to changes following infection. We then tested if RBD-Ig incubation with  
220 293T-ACE2 cells will lead to reduced ACE2 surface expression as we hypothesized that  
221 this might be the reason why RBD-Ig is more efficient than ACE2-Ig at neutralizing  
222 infection. We incubated RBD-Ig or Control-Ig with 293T-ACE2 cells for 1, 2, 6 and 24  
223 hours. Following incubation cells were harvested and ACE2 surface expression was  
224 assessed by flow cytometry using our generated antibody, anti-ACE2 01. As can be seen  
225 in Figure 5D, ACE2 surface levels were only slightly reduced following RBD-Ig binding,  
226 suggesting that this is not the reason why RBD-Ig is superior to ACE2-Ig.

227 Next, we examined whether ACE2 activity will be altered following interaction with  
228 RBD-Ig, as we thought that maybe the activity of ACE2 might affect somehow the  
229 infection. We incubated 0.1 or 1 ug of RBD-Ig or Control-Ig with recombinant human  
230 ACE2 or with 293T-ACE2 cells lysate. ACE2 activity was not affected by RBD-Ig when  
231 incubated with human ACE2 or with a lysate containing ACE2 (Figure 5E). These

232 combined results suggest that treatment with RBD-Ig inhibits infection without affecting  
233 ACE2 activity and surface levels expression.  
234 Our last assumption was that RBD-Ig inhibits infection by physically blocking ACE2.  
235 We further hypothesized that RBD-Ig is more efficient than ACE2-Ig because RBD-Ig  
236 binds to ACE2, for which surface expression does not change following infection (Figure  
237 5C, right). In contrast, ACE2-Ig may be less efficient since it targets the spike protein of  
238 a constantly replicating virus. To test this hypothesis, we performed a plaque reduction  
239 neutralization test (PRNT) as described above (Figure 2C and D). However, instead of  
240 increasing the fusion protein concentration, we used one concentration of the fusion  
241 proteins (20ug/well) and increased SARS-CoV-2 titers. Neutralization percentages were  
242 calculated as compared to respective Control-Ig. RBD-Ig treatment was significantly  
243 more efficient at inhibiting in vitro SARS-CoV-2 infection as compared to ACE2-Ig  
244 (Figure 5F).

## 245 **Discussion**

246 Saturday 30 January 2021 marked one year since the WHO declared COVID-19 as an  
247 international concerning health emergency. At that time, only 9826 SARS-CoV-2 cases  
248 were reported in 20 countries. As of February 2, 2021, the total number of cases is ~102  
249 million with ~2.2 million deaths reported in 222 countries [28]. As it is now clear that the  
250 pandemic will not end soon, a treatment for SARS-CoV-2 infected patients is urgently  
251 needed. The need arises since vaccination with the Moderna or Pfizer vaccines had just  
252 started, and even vaccinated individuals might not be fully protected. First as the vaccines  
253 efficiency is ~95% [29] and second because lately alarming SARS-CoV-2 spike  
254 mutations were observed in different countries and were transmitted across the world

255 [30][31][32][33]. While the E484K mutations only reduces neutralizing activity of  
256 human convalescent and post-vaccination sera [34], the SARS-CoV-2 501Y.V2 south  
257 African variant contains multiple mutations that may enable escape from neutralizing  
258 antibodies [35]. These data suggest that reinfection with antigenically distinct variants is  
259 possible and may reduce efficacy of current spike-based vaccines.

260 Recently, Bamlanivimab, a recombinant, neutralizing human IgG1 monoclonal antibody  
261 against SARS-CoV-2 spike protein has been authorized by the FDA under an emergency  
262 use authorization [36]. But as antibodies are highly specific, there is a risk that the virus  
263 will develop escape mutations. This scenario is less likely when using a full protein or  
264 one of its domains. For that purpose, we generated the fusion proteins ACE2-Ig and  
265 RBD-Ig and tested their functionality. We also tested the ACE2-Ig enzymatic activity  
266 since it is known that dysregulation of ACE2 activity can adversely exacerbate lung  
267 inflammation and injury [37,38], and induce a general pro-inflammatory response  
268 [39,40]. After demonstrating that ACE2-Ig is enzymatically active, we wanted to  
269 examine whether ACE2 activity is required for the binding to SARS-CoV-2 spike  
270 protein. We demonstrated that the enzymatic activity of ACE2 is not required for its  
271 recognition by SARS-CoV-2 RBD. Confirming these results, it was previously reported  
272 that binding of SARS-CoV spike protein to ACE2 is also independent of ACE2 catalytic  
273 activity [41].

274 We showed that ACE2-Ig inhibits in vitro SARS-CoV-2 infection as it has been  
275 previously shown [42] and that RBD-Ig inhibits infection significantly more than ACE2-  
276 Ig. Furthermore, we show that treatment with RBD-Ig using SARS-CoV-2 K18-hACE2  
277 infected mice led to decrease in disease severity as assessed by reduced body weight and

278 increased mice survival. Importantly, 50% of the RBD-Ig treated mice survived although  
279 active infection occurred, while ACE2-Ig injection had no effect. We think that the  
280 reason behind the low efficiency of ACE2-Ig in vivo is due to the low concentrations of  
281 fusion protein we administered which was 75ug/mouse, injected intraperitoneally.  
282 Indeed, when Iwanaga et al injected intravenously ACE2-Ig at 15mg/kg per mouse an  
283 effect was observed [43].

284 We demonstrated that the superiority of RBD-Ig was not due to quantitative or qualitative  
285 changes in the antibody response, we thus hypothesized that it may be due to RBD-Ig  
286 effect on its target protein ACE2. To check this, we first wanted to assess whether  
287 changes occur in ACE2 surface expression as it is targeted by RBD-Ig. No changes were  
288 observed in ACE2 surface expression in SARS-CoV-2 infected cells at different time  
289 points. Although many suggest that an ACE2 downregulation might occur during  
290 infection [44][45][46], to the best of our knowledge this has not been investigated,  
291 perhaps because there was no effective commercial antibody available against ACE2.

292 We also assessed ACE2 surface expression following RBD-Ig incubation and saw that  
293 ACE2 expression did not change drastically. Another important check was of ACE2  
294 enzymatic activity following binding to SARS-CoV-2 RBD as it was reported to enhance  
295 ACE2 activity [47]. In contrast, we report here that ACE2 activity was not affected  
296 following incubation with RBD-Ig. The reason for this discrepancy is not understood.

297 We next hypothesized that RBD-Ig blocks infection by physically interacting with ACE2.  
298 We further thought that RBD-Ig is more efficient than ACE2-Ig since RBD-Ig, binds to  
299 the constantly expressed ACE2 on the target cells, while ACE2-Ig interacts with the spike

300 protein found on a replicating virus. Indeed, we showed that RBD-Ig can neutralizes in  
301 vitro SARS-CoV-2 even at high virus titers, while ACE2-Ig cannot.

302 To summarize we suggest that RBD-Ig inhibit SARS-CoV-2 infection by physically  
303 blocking ACE2. Thus, RBD-Ig is particularly advantageous as a treatment for SARS-  
304 CoV-2 infection since it targets ACE2 which expression on cell surface remains almost  
305 constant, rather than a mutating and replicating virus.

306

307

308 **Methods**

309 *Cell lines and viruses*

310 293T cells (CRL-3216) were grown in Dulbecco's modified Eagle's medium (DMEM,  
311 Sigma-Aldrich) containing 10% Fetal bovine serum (FBS), (Sigma-Aldrich), 1% L-  
312 glutamine (Biological Industries (BI)), 1% sodium pyruvate (BI), 1% nonessential amino  
313 acids (BI), and 1% penicillin-streptomycin (BI). Vero E6 cells (CRL-1586) were grown  
314 in DMEM containing 10% FBS, MEM non-essential amino acids (NEAA), 2mM L-  
315 Glutamine, 100Units/ml Penicillin, 0.1mg/ml streptomycin, 12.5 Units/ml Nystatin  
316 (P/S/N) (BI). All cells were cultured at 37°C, 5% CO<sub>2</sub> at 95% air atmosphere.  
317 SARS-CoV-2 (GISAID accession EPI\_ISL\_406862) was kindly provided by  
318 Bundeswehr Institute of Microbiology, Munich, Germany. Virus stocks were propagated  
319 (4 passages) and tittered on Vero E6 cells. Handling and experiments with SARS-CoV-2  
320 virus were conducted in a BSL3 facility in accordance with the biosafety guidelines of  
321 the Israel Institute for Biological Research (IIBR).

322 *Mice*

323 Homozygous female outbred K18-hACE2 transgenic mice (2B6.Cg-Tg(K18-  
324 ACE2)2PrImn/J, Stock No: 034860, Jackson laboratory) 6-8 weeks old were maintained  
325 at 20-22°C with relative humidity of 50 ± 10% on a 12hrs light/dark cycle. Animals were  
326 fed with commercial rodent chow (Koffolk Inc.) and provided with tap water ad libitum.  
327 Prior infection, mice were kept in groups of 10. Mice were randomly assigned to  
328 experimental groups of 7-8 mice per group. 200 PFU of SARS-CoV-2 (10-15 LD<sub>50</sub>) was  
329 diluted in PBS supplemented with 2% FBS (BI) to infect animal by 20µl intranasal  
330 instillation of anesthetized mice. Body weight was monitored daily over 13-15 days. At



331 15 dpi mice were bled through the venous tail and sera were obtained. Residual SARS-  
332 CoV-2 virus in the sera was neutralized by heating to 60°C for 30 minutes. Four groups  
333 of mice were used: 1. Naïve (uninfected & untreated mice). 2. Infected and treated with  
334 Control-Ig. 3. Infected and treated with ACE2-Ig. 4. Infected and treated with RBD-Ig.

### 335 *Flow cytometry*

336 Primary antibody staining was performed at 4°C for 1 hour, cells were then washed in  
337 FACS buffer (1% BSA and 0.05% Sodium Azide in phosphate-buffered saline) and  
338 secondary antibody was added for 30 minutes at 4°C. Then, cells were washed in FACS  
339 buffer and fixed with 4% paraformaldehyde for 20 minutes followed by CytoFlex  
340 analysis. We used the following primary antibodies: Rabbit MAb SARS-CoV-2 Spike S1  
341 Antibody (Cat#40150-R007-100, Sino Biological), Purified anti-DYKDDDDK Tag  
342 Antibody (Cat#637302, BioLegend), anti-ACE2 01 (generated by us). The following  
343 secondary antibodies were used: Alexa Fluor 647- conjugated Goat Anti-Rabbit IgG  
344 (Cat#111-606-144, Jackson ImmunoResearch Laboratories), Alexa Fluor 647-conjugated  
345 Donkey anti-human IgG (Cat#709-606-098, Jackson ImmunoResearch Laboratories),  
346 Alexa Fluor 647-conjugated Goat Anti-Mouse IgG (Cat#115-606-062, Jackson  
347 ImmunoResearch Laboratories). Data were analyzed using FCS Express 6/7.

### 348 *Fusion proteins*

349 PCR-generated fragments encoding the extracellular part of human ACE2 or SARS-CoV-  
350 2 RBD were each cloned into vectors containing the Fc portion of human IgG1, and a  
351 Puromycin resistance gene. Sequencing of the constructs revealed that cDNA of all Ig-  
352 fusion proteins was in frame with the human Fc genomic DNA and were identical to the  
353 reported sequences. The Ig-vectors were then introduced to 293T cells (CRL-3216,

354 ATCC) and the transfected cells were grown in the continuous presence of Puromycin.  
355 The ACE2-Ig and RBD-Ig fusion proteins secreted to the medium were purified on  
356 HiTrap Protein G High Performance column (Cat#GE17-0405-01, GE Healthcare).  
357 Control-Ig was one of the following fusion proteins: KIR2DL1-Ig/KIR2DS1-Ig/ CD59-  
358 Ig/CD16-Ig, which were previously made in our lab as described here [48]. RBD PCR-  
359 generated fragments were made from 2 separated PCR reactions followed by a third  
360 reaction in which we used the forward primer of reaction 1, the reverse primer of reaction  
361 2 and the products from reaction 1 and 2 as a template. The RBD portion of the fusion  
362 protein is composed of 331-524 AA from the full spike protein fused to the IgG1 human  
363 portion. Primer FW for ACE2-Ig:  
364 AAAGCTAGCGCCGCCACCATGTCAAGCTCTTCCTGGC. Primer RV for ACE2-Ig:  
365 TTTTGATCAGAAACAGGGGGCTG. Primer FW for RBD-Ig reaction 1:  
366 AAATTGAATTCGCCGCCACCATGCCCATGGGGTCTCTGCA. Primer RV for  
367 RBD-Ig reaction 1: GTTGGTGATGTTTCCGAGGCAGGAAGCGACC. Primer FW for  
368 RBD-Ig reaction 2: GCCTCGGAAACATCACCAACCTGTGTCCAT. Primer RV for  
369 RBD-Ig reaction 2: TTTGGATCCACTGTGGCAGGGGCATGG.

### 370 *Lentivirus production*

371 Lentiviral vectors were produced by transient three-plasmid transfection as described  
372 here [49]. First, 293T cells were grown overnight in 6-well plates ( $2.2 \times 10^5$  cells/well).  
373 The following day pMD.G / VSV-G/ SARS-CoV-2 spike envelope expressing plasmid  
374 (0.35  $\mu\text{g}/\text{well}$ ), a gag-pol packaging construct (0.65  $\mu\text{g}/\text{well}$ ) and the relevant vector  
375 construct (1  $\mu\text{g}/\text{well}$ ) were transfected using the TransIT®-LT1 Transfection Reagent

376 (MIR 2306, Mirus). Two days after transfection the soups containing the viruses were  
377 collected and filtered.

### 378 *Generation of 293T-ACE2 cells*

379 ACE2 was amplified from cDNA and an N-terminal Flag-Tag was introduced  
380 immediately after the signal peptide. The flag-tagged ACE2 was cloned into the plasmid  
381 pHAGE- DsRED(-) GFP(+). This plasmid carrying the Flag-tagged ACE2 was used as a  
382 vector construct to produce lentiviruses as described above. The resulting lentiviruses  
383 were used to infect 293T cells. The transduced cells were stained with anti-human ACE-  
384 2, RBD-Ig and checked for GFP percentage by Flow Cytometry. PCR-generated  
385 fragments were made from 2 separated PCR reactions followed by a third reaction in  
386 which we used the forward primer of reaction 1, the reverse primer of reaction 2 and the  
387 products from reaction 1 and 2 as a template. Primer FW reaction 1:  
388 AAATTGAATTCGCCGCCACCATGCCCATGGGGTCTCTGCA. Primer RV reaction  
389 1: GTTGGTGATGTTTCCGAGGCAGGAAGCGACC. Primer FW reaction 2:  
390 GCCTCGGAAACATCACCAACCTGTGTCCAT. Primer RV reaction 2:  
391 TTTGGATCCACTGTGGCAGGGGCATGG.

### 392 *Generation of 293T-Spike cells*

393 First, 293T cells were grown overnight in 6-well plates ( $2.2 \times 10^5$  cells/well). Then SARS-  
394 CoV-2 spike envelope expression plasmid was co-transfected as described above with the  
395 plasmid pHAGE- DsRED(-) GFP(+) as a vector construct. As a control we performed the  
396 same co-transfection but with the VSV-G envelope plasmid. 48 hours following  
397 transfection, media (containing lentiviruses) was removed, and cells were used for flow

398 cytometry experiments. Transfection efficiency was assessed by GFP expression. For  
399 each flow cytometry experiment we generated new 293T-Spike cells as described here.

#### 400 ***Enzymatic activity***

401 The enzymatic activity of the ACE2-Ig fusion protein was evaluated using the ACE2  
402 Activity Assay Kit (Fluorometric) (Cat#BN01071, Assay Genie) according to the  
403 manufacturer instructions. 0.8 ug/well of ACE2-Ig was used with or without the inhibitor  
404 supplied with the kit. The 293T-ACE2 cells lysate was prepared and 10 ug of it was  
405 incubated with RBD-Ig according to the manufacturer instructions. Plates were read by  
406 Tecan Spark 10M and data were analyzed using Magellan 1.1.

#### 407 ***Fusion protein staining with inhibitor***

408 0.8 ug/well of ACE2-Ig was incubated with or without the ACE2 inhibitor (supplied with  
409 the kit described above) for 15 minutes at room temperature. Then, ACE2-Ig (with or  
410 without the inhibitor) was added to either the 293T parental cells or to the 293T-Spike  
411 cells for 1 hour at 4°C. Afterwards, cells were washed in FACS buffer and stained with  
412 Alexa Fluor 647-conjugated anti-human IgG secondary antibody. Then, cells were  
413 washed in FACS buffer and analyzed by CytoFlex.

#### 414 ***SARS-CoV-2 Plaque reduction neutralization test (PRNT) with ACE2-Ig***

415 Vero E6 cells (CRL-1586, ATCC) were seeded in 12-well plates ( $5 \times 10^5$  cells/well) and  
416 grown overnight in Penicillin-Streptomycin-Neomycin (P/S/N, BI) containing medium.  
417 The following day, ACE2-Ig and Control-Ig were either diluted to 50 $\mu$ g/ml-0.048 $\mu$ g/ml  
418 or 200ug/ml in 400 $\mu$ l of MEM containing 2% FBS, NEAA, 2mM L-Glutamine, and  
419 P/S/N. The diluted fusion proteins ACE2-Ig and Control-Ig were then mixed with 400 $\mu$ l  
420 of 300 PFU (Plaque Forming Units)/ml or 100- 218,700 PFU/ml of SARS-CoV-2.

421 The virus-protein mixtures were incubated at 37°C, 5% CO<sub>2</sub> for 1 hour. Vero E6 cell  
422 monolayers were washed once with DMEM and 200µl of each dilution of protein-virus  
423 mixture was added in triplicates for 1 hour at 37°C. Virus without fusion protein served  
424 as control. 2ml/well overlay {MEM containing 2% FBS and 0.4% Tragacanth (Sigma-  
425 Aldrich)} were added to each well and plates were incubated at 37°C 5% CO<sub>2</sub> for 48  
426 hours. The overlay was then aspirated, the cells were fixed and stained with 1ml of  
427 crystal violet solution (BI). The number of plaques in each well were determined and  
428 neutralization percentages were calculated as follows:  $100 \times [1 - (\text{average number of}$   
429  $\text{plaques for each dilution/average number of the virus dose control plaques})]$ . SARS-  
430 CoV-2 strain used was kindly provided by Bundeswehr Institute of Microbiology,  
431 Munich, Germany (GISAID accession EPI\_ISL\_406862)

#### 432 ***SARS-CoV-2 PRNT with RBD-Ig***

433 Vero E6 cells were seeded in 12-well plates as described above. The next day, RBD-Ig  
434 and Control-Ig were either diluted to 25µg/ml-0.024µg/ml or 100ug/ml in 400µl of MEM  
435 containing 2% FBS, NEAA, 2mM L-Glutamine, and P/S/N. Cell monolayers were  
436 washed once with DMEM and the diluted fusion protein RBD-Ig or Control-Ig was then  
437 added in triplicates (200µl/well). Cell monolayers were then incubated at 37°C, 5% CO<sub>2</sub>  
438 for 1 hour. Afterwards 100µl of 300 PFU (Plaque Forming Units)/ml or 100- 218,700  
439 PFU/ml of SARS-CoV-2 was added for 1 hour at 37°C. Then 2ml/well overlay were  
440 added, and plates were incubated at 37°C 5% CO<sub>2</sub> for 48 hours, as described above. The  
441 cells were then fixed and stained, and neutralization percentages were determined as  
442 described above.

#### 443 ***In vivo treatment with fusion proteins***

444 SARS-CoV-2 infected mice were treated with 75ug/mouse of the fusion protein (Control-  
445 Ig/ ACE2-Ig/ RBD-Ig) at 3 time points: day 1, day 2/3 and day 3/5 post-infection (PI).  
446 Treatment was intraperitoneally (IP) administered in 300 ul. Mice were infected with a  
447 SARS-CoV-2 strain kindly provided by Prof. Dr. Christian Drosten (Charité, Berlin)  
448 (EVAg Ref-SKU: 026V-03883).

#### 449 ***Staining with mice sera***

450 Sera were obtained 15 dpi from the various immunized groups and from naïve mice. Sera  
451 were diluted to 1:500, 1:1K, 1:5K, 1:10K per well and added to 50,000 293T-Parental  
452 cells or 293T-Spike cells in a 96-U-well plate for 1 hour at 4°C. Cells were then washed,  
453 and an Alexa Fluor 647 Anti-Mouse IgG secondary antibody was added.

#### 454 ***Blocking with mice sera***

455 Sera from the various immunized mice groups was diluted to 1:100 per well and added to  
456 50K 293T-Parental cells or 293T-Spike cells in a 96-U-well plate for 1 hour at 4°C.  
457 Afterwards, ACE2-Ig was added as a primary antibody for 1 hour at 4°C. Then, cells  
458 were washed, and Alexa Fluor 647 Anti-human IgG secondary antibody was added.

#### 459 ***Statistics***

460 Statistical analysis were performed using either Prism 8 (GraphPad) or Excel (Microsoft).  
461 Error bars represent SD. All the relevant statistical data for the experiments including the  
462 statistical test used, value of n, definition of significance, etc. can be found in the figure  
463 legends or the relevant method section.

#### 464 ***Study approval***

465 Animal experiments involving SARS-CoV-2 were conducted in a BSL3 facility and  
466 treatment of animals was in accordance with regulations outlined in the U.S. Department

467 of Agriculture (USDA) Animal Welfare Act and the conditions specified in the Guide for  
468 Care and Use of Laboratory Animals (National Institute of Health, 2011). Animal studies  
469 were approved by the local IIBR ethical committee on animal experiments (protocol  
470 number M-54-20).

#### 471 **Author contributions**

472 Conceptualization, O.M. and A.C.; Methodology, O.M, A.C., H.A., I.K., D.W. ;  
473 Investigation, A.C., H.A., I.K., I.B., T.L.R., G.R., O.A, E.B.V., T.I., S.M., B.P., E.Z. ;  
474 Resources, O.M., H.A., E.B.V., T.I., S.M., B.P., E.Z., D.W., S.J., O.A.; Writing –  
475 Original Draft, O.M. and A.C.; Writing – Review & Editing, O.M., A.C., S.J. and  
476 O.B.; Visualization, O.B.; Supervision, O.M.; Project Administration, O.M.; Funding  
477 Acquisition, O.M., I.B. and S.J.

478

#### 479 **Acknowledgments**

480 The authors would like to thank Prof. Dr. Christian Drosten at the Charité-  
481 Universitätsmedizin, Institute of Virology, Berlin, Germany for providing the SARS-  
482 CoV-2 BavPat1/2020 strain. We would like to also thank Dr. Alex Rouvinski (Hebrew  
483 university, Israel) for kindly providing the SARS-CoV-2 spike envelope plasmid. Figure  
484 1A was generated using BioRender.com. This work was supported by Integra Holdings,  
485 the Israel Science Foundation (Moked grant), the GIF Foundation, the ICRF  
486 professorship grant, the ISF Israel- China grant, the MOST-DKFZ grant, the ERC Marie  
487 Currie grant, the Rothschild Foundation, the Croatian Science Foundation (IP-CORONA-

488 04-2073) (I.B.) and by the grant “Strengthening the capacity of CerVirVac for research in  
489 virus immunology and vaccinology”, KK.01.1.1.01.0006, awarded to the Scientific  
490 Centre of Excellence for Virus Immunology and Vaccines and co-financed by the  
491 European Regional Development Fund (S.J.).

492 **Figure 1: RBD-Ig and ACE2-Ig bind their respective target**

493 (A) Schematic representation of our proposed treatments. SARS-CoV-2 infects ACE2  
494 expressing cells (left panel). Binding of ACE2-Ig to SARS-CoV-2 Spike protein (middle  
495 panel) or binding of RBD-Ig to the ACE2 receptor (right panel) may prevent infection.  
496 (B) Staining of cells transfected to express ACE2 with an N-terminal Flag-tag (293T-  
497 ACE2 cells) and their parental cells that do not express a tag. This staining was  
498 performed using an anti-Flag antibody. (C) Staining of 293T-ACE2 cells with RBD-Ig.  
499 (D) Left panel: Spike protein surface expression on 293T cells co-transfected with either  
500 SARS-CoV-2 Spike envelope plasmid (293T-Spike cells) or Vesicular stomatitis virus  
501 (VSV) G envelope plasmid (293T-VSV-G cells). Right panel: Staining of 293T-Spike  
502 cells with ACE2-Ig. All histograms except from those made for 293T-Parental cells, were  
503 made from GFP positive gated cells. Figures shows one representative experiment out of  
504 3 performed.

505 **Figure 2: ACE2-Ig and RBD-Ig inhibits in vitro SARS-CoV-2 infection**

506 (A) ACE2 enzymatic activity assay. Recombinant human ACE2 and ACE2-Ig were  
507 incubated with and without an ACE2 inhibitor, then MCA based peptide substrate was  
508 added and plate was immediately inserted in the fluorescent plate reader. \* $p < 0.005$ ,  
509 \*\* $p < 0.0005$ , \*\*\* $p < 0.00005$ , Student’s t-test as compared to same treatment with



510 inhibitor. (B) Staining of 293T-Spike cells with ACE2-Ig which was previously  
511 incubated for 15 minutes with or without an ACE2 inhibitor. (C-D) Plaque reduction  
512 neutralization test. Vero E6 cells were infected with SARS-CoV-2 and treated with  
513 increasing concentrations of either Control-Ig, ACE2-Ig (C) or RBD-Ig (D). %  
514 Neutralization was calculated as the percent of the decrease in plaque numbers, as  
515 compared with the background control. \*P < 0.05; \*\*P < 0.01; \*\*\*P < 0.001; Student's t-  
516 test as compared to Control-Ig. Figures shows one representative experiment out of 3  
517 performed.

518 **Figure 3: RBD-Ig decreases disease severity of SARS-CoV-2 infected mice**

519 (A) Homozygous female K18-hACE2 transgenic mice were infected with SARS-CoV-2  
520 (day 0) and treated with 75ug/mouse of either Control-Ig, RBD-Ig or ACE2-Ig. % of  
521 initial body weight was calculated from mice which were weighed daily. (B) Survival  
522 percentages of SARS-CoV-2 infected mice treated as described in A. \*P < 0.05; Mantel-  
523 Cox test as compared to Infected + Control-Ig. Figure shows the combined results of two  
524 independent experiments.

525 **Figure 4: Blocking anti-Spike antibodies are generated in all immunized mice**

526 (A) Anti-Spike IgG antibodies generated by mice following infection with SARS-CoV-2.  
527 Sera were taken 15 dpi from all mice groups and from naïve mice and diluted as indicated  
528 (upper right). Sera was incubated either with 293T-Spike cells (upper histograms) or with  
529 293T-ACE2 cells (lower histograms) as a primary antibody then cells were stained with  
530 Alexa fluor 647 anti-mouse IgG secondary antibody. (B) ACE2-Ig staining of 293T-  
531 Spike cells in the presence or absence of sera from the various groups. Sera from all

532 indicated groups were incubated with 293T-Spike cells for 1 hour at 4°C followed by  
533 staining with ACE2-Ig. All histograms were gated on GFP positive cells. Figure shows  
534 one representative experiment out of 2 performed.

535 **Figure 5: Effects of RBD-Ig**

536 (A) Staining of 293T-Parental cells and 293T-ACE2 cells with the mAb anti-ACE2 01  
537 we generated. (B) Staining of 293T-Parental cells and 293T-ACE2 cells with RBD-Ig.  
538 Cells were incubated with or without anti-ACE2 01 for 1 hour at 4°C, washed and then  
539 staining was performed. (C) Staining of infected (MOI 0.5) and uninfected VERO E6  
540 cells with either an anti-Spike antibody to verify infection (left panel) or with our anti-  
541 ACE2 01 antibody (right panel) at 16,24,48 hours PI. (D) Staining with anti-ACE 01 of  
542 293T-ACE2 cells which were incubated with 1 ug of either Control-Ig or RBD-Ig for  
543 1,2,6 and 24 hours. (A-D) All histograms were gated on GFP positive cells. (E) ACE2  
544 enzymatic activity assay. Recombinant human ACE2 and 293T-ACE2 cells lysate (10  
545 ug) were incubated with either Control-Ig (1 ug) or RBD-Ig (0.1 ug or 1ug), then MCA  
546 based peptide substrate was added and plate was immediately read in the fluorescent  
547 plate reader. Not significant (NS), Student's t-test as compared with Control-Ig. (F)  
548 Plaque reduction neutralization test. Vero E6 cells were infected with increasing SARS-  
549 CoV-2 titers and treated with 20 ug/well of either Control-Ig, ACE2-Ig or RBD-Ig. %  
550 Neutralization was calculated as the percent of the decrease in plaque numbers, as  
551 compared with cells treated with Control-Ig. \*P < 0.01; \*\*P< 0.005; \*\*\*P <0.00001;  
552 Student's t-test. Figures shows one representative experiment out of 3 (A-E) or 2 (F)  
553 performed.

554

## 555 **References**

- 556 1. Chakraborty I, Maity P. COVID-19 outbreak: Migration, effects on society, global  
557 environment and prevention. *Sci Total Environ* [Internet]. 2020 Aug 1 [cited 2020  
558 Nov 22];728. Available from: <https://doi.org/10.1016/j.scitotenv.2020.138882>
- 559 2. Administration D. Pfizer COVID-19 Vaccine EUA Letter of Authorization  
560 reissued 12-23-20. 2020.
- 561 3. Administration D. Moderna COVID-19 Vaccine EUA Letter of Authorization.  
562 2020.
- 563 4. A Study of Ad26.COV2.S for the Prevention of SARS-CoV-2-Mediated COVID-  
564 19 in Adult Participants - Full Text View - ClinicalTrials.gov [Internet]. [cited  
565 2021 Apr 6]. Available from:  
566 <https://clinicaltrials.gov/ct2/show/NCT04505722#wrapper>
- 567 5. Polack FP, Thomas SJ, Kitchin N, Absalon J, Gurtman A, Lockhart S, et al. Safety  
568 and Efficacy of the BNT162b2 mRNA Covid-19 Vaccine. *N Engl J Med*  
569 [Internet]. 2020 Dec 31 [cited 2021 Feb 8];383(27):2603–15. Available from:  
570 <http://www.nejm.org/doi/10.1056/NEJMoa2034577>
- 571 6. Baden LR, El Sahly HM, Essink B, Kotloff K, Frey S, Novak R, et al. Efficacy  
572 and Safety of the mRNA-1273 SARS-CoV-2 Vaccine. *N Engl J Med* [Internet].  
573 2021 Feb 4 [cited 2021 Feb 8];384(5):403–16. Available from:  
574 <http://www.nejm.org/doi/10.1056/NEJMoa2035389>
- 575 7. Williams TC, Burgers WA. SARS-CoV-2 evolution and vaccines: cause for  
576 concern? *Lancet Respir Med* [Internet]. 2021 Jan 29 [cited 2021 Feb 4];0(0).  
577 Available from: <http://www.ncbi.nlm.nih.gov/pubmed/33524316>
- 578 8. Wang Q, Zhang Y, Wu L, Niu S, Song C, Zhang Z, et al. Structural and Functional  
579 Basis of SARS-CoV-2 Entry by Using Human ACE2. *Cell* [Internet]. 2020 May  
580 14 [cited 2020 Aug 11];181(4):894-904.e9. Available from:  
581 </pmc/articles/PMC7144619/?report=abstract>
- 582 9. Shang J, Ye G, Shi K, Wan Y, Luo C, Aihara H, et al. Structural basis of receptor  
583 recognition by SARS-CoV-2. *Nature* [Internet]. 2020 May 14 [cited 2020 Nov  
584 18];581(7807):221–4. Available from:  
585 </pmc/articles/PMC7328981/?report=abstract>
- 586 10. Loganathan S, Kuppusamy M, Wankhar W, Gurugubelli KR, Mahadevappa VH,  
587 Lepcha L, et al. Angiotensin-converting enzyme 2 (ACE2): COVID 19 gate way to  
588 multiple organ failure syndromes. Vol. 283, *Respiratory Physiology and*  
589 *Neurobiology*. Elsevier B.V.; 2021. p. 103548.
- 590 11. Wang T, Du Z, Zhu F, Cao Z, An Y, Gao Y, et al. Comorbidities and multi-organ  
591 injuries in the treatment of COVID-19. *Lancet* [Internet]. 2020 [cited 2020 Nov  
592 25];395:e52. Available from: <https://www.bbc.co>

- 593 12. Wang W, McKinnie SMK, Farhan M, Paul M, McDonald T, McLean B, et al.  
594 Angiotensin-Converting Enzyme 2 Metabolizes and Partially Inactivates Pyr-  
595 Apelin-13 and Apelin-17: Physiological Effects in the Cardiovascular System.  
596 Hypertension [Internet]. 2016 Aug 1 [cited 2020 Nov 18];68(2):365–77. Available  
597 from:  
598 <https://www.ahajournals.org/doi/10.1161/HYPERTENSIONAHA.115.06892>
- 599 13. Flores-Muñoz M, Smith NJ, Haggerty C, Milligan G, Nicklin SA. Angiotensin1-9  
600 antagonises pro-hypertrophic signalling in cardiomyocytes via the angiotensin type  
601 2 receptor. *J Physiol* [Internet]. 2011 Feb [cited 2020 Nov 18];589(4):939–51.  
602 Available from: <https://pubmed.ncbi.nlm.nih.gov/21173078/>
- 603 14. Donoghue M, Hsieh F, Baronas E, Godbout K, Gosselin M, Stagliano N, et al. A  
604 novel angiotensin-converting enzyme-related carboxypeptidase (ACE2) converts  
605 angiotensin I to angiotensin 1-9. *Circ Res* [Internet]. 2000 Sep 1 [cited 2020 Nov  
606 18];87(5). Available from: <http://www.circresaha.org>.
- 607 15. Rebold N, Holger D, Alosaimy S, Morrisette T, Rybak M. COVID-19: Before the  
608 Fall, An Evidence-Based Narrative Review of Treatment Options. *Infect Dis Ther*  
609 [Internet]. 2021 Jan 25 [cited 2021 Feb 4];1–21. Available from:  
610 <http://www.ncbi.nlm.nih.gov/pubmed/33495967>
- 611 16. Beck A, Reichert JM. Therapeutic Fc-fusion proteins and peptides as successful  
612 alternatives to antibodies [Internet]. Vol. 3, mAbs. MABS; 2011 [cited 2020 Nov  
613 18]. p. 415–6. Available from: <https://pubmed.ncbi.nlm.nih.gov/21785279/>
- 614 17. Capon DJ, Chamow SM, Mordenti J, Marsters SA, Gregory T, Mitsuya H, et al.  
615 Designing CD4 immunoadhesins for AIDS therapy. *Nature*. 1989;337(6207):525–  
616 31.
- 617 18. Czajkowsky DM, Hu J, Shao Z, Pleass RJ. Fc-fusion proteins: New developments  
618 and future perspectives [Internet]. Vol. 4, EMBO Molecular Medicine. EMBO  
619 Mol Med; 2012 [cited 2020 Nov 18]. p. 1015–28. Available from:  
620 <https://pubmed.ncbi.nlm.nih.gov/22837174/>
- 621 19. Lei C, Qian K, Li T, Zhang S, Fu W, Ding M, et al. Neutralization of SARS-CoV-  
622 2 spike pseudotyped virus by recombinant ACE2-Ig. *Nat Commun* [Internet]. 2020  
623 Dec 1 [cited 2020 Jun 30];11(1):1–5. Available from:  
624 <https://www.nature.com/articles/s41467-020-16048-4>
- 625 20. Monteil V, Kwon H, Prado P, Hagelkrüys A, Wimmer RA, Stahl M, et al.  
626 Inhibition of SARS-CoV-2 Infections in Engineered Human Tissues Using  
627 Clinical-Grade Soluble Human ACE2. *Cell*. 2020 May 14;181(4):905-913.e7.
- 628 21. Liu X, Drelich A, Li W, Chen C, Sun Z, Shi M, et al. Enhanced elicitation of  
629 potent neutralizing antibodies by the SARS-CoV-2 spike receptor binding domain  
630 Fc fusion protein in mice. *Vaccine*. 2020 Oct 27;38(46):7205–12.
- 631 22. Quinlan BD, Mou H, Zhang L, Guo Y, He W, Ojha A, et al. The SARS-CoV-2

- 632 Receptor-Binding Domain Elicits a Potent Neutralizing Response Without  
633 Antibody-Dependent Enhancement. SSRN Electron J [Internet]. 2020 Apr 15  
634 [cited 2020 Nov 18]; Available from: <https://papers.ssrn.com/abstract=3575134>
- 635 23. Xiao L, Sakagami H, Miwa N. ACE2: The key molecule for understanding the  
636 pathophysiology of severe and critical conditions of COVID-19: Demon or angel?  
637 [Internet]. Vol. 12, Viruses. MDPI AG; 2020 [cited 2020 Nov 18]. Available from:  
638 <https://pubmed.ncbi.nlm.nih.gov/32354022/>
- 639 24. Devaux CA, Rolain JM, Raoult D. ACE2 receptor polymorphism: Susceptibility to  
640 SARS-CoV-2, hypertension, multi-organ failure, and COVID-19 disease outcome.  
641 Vol. 53, Journal of Microbiology, Immunology and Infection. Elsevier Ltd; 2020.  
642 p. 425–35.
- 643 25. Zhou P, Yang X Lou, Wang XG, Hu B, Zhang L, Zhang W, et al. A pneumonia  
644 outbreak associated with a new coronavirus of probable bat origin. Nature  
645 [Internet]. 2020 Mar 12 [cited 2021 Feb 8];579(7798):270–3. Available from:  
646 <https://doi.org/10.1038/s41586-020-2012-7>
- 647 26. Winkler ES, Bailey AL, Kafai NM, Nair S, McCune BT, Yu J, et al. SARS-CoV-2  
648 infection of human ACE2-transgenic mice causes severe lung inflammation and  
649 impaired function. Nat Immunol [Internet]. 2020;21(11):1327–35. Available from:  
650 <http://dx.doi.org/10.1038/s41590-020-0778-2>
- 651 27. Ju B, Zhang Q, Ge J, Wang R, Sun J, Ge X, et al. Human neutralizing antibodies  
652 elicited by SARS-CoV-2 infection. Nature [Internet]. 2020 Aug 6 [cited 2020 Nov  
653 25];584(7819):115–9. Available from: <https://pubmed.ncbi.nlm.nih.gov/32454513/>
- 654 28. World Health Organization. COVID-19 Weekly Epidemiological Update 22.  
655 World Heal Organ [Internet]. 2021;(January):1–3. Available from:  
656 [https://www.who.int/docs/default-source/coronaviruse/situation-](https://www.who.int/docs/default-source/coronaviruse/situation-reports/weekly_epidemiological_update_22.pdf)  
657 [reports/weekly\\_epidemiological\\_update\\_22.pdf](https://www.who.int/docs/default-source/coronaviruse/situation-reports/weekly_epidemiological_update_22.pdf)
- 658 29. Cohen J. Vaccine wagers on coronavirus surface protein pay off. Science (80- )  
659 [Internet]. 2020 Nov 20 [cited 2020 Nov 30];370(6519):894–5. Available from:  
660 <https://www.sciencemag.org/lookup/doi/10.1126/science.370.6519.894>
- 661 30. Tegally H, Wilkinson E, Giovanetti M, Iranzadeh A, Fonseca V, Giandhari J, et al.  
662 Sibongile Walaza 9. Arghavan Alisoltani-Dehkordi [Internet]. 2020 Dec 22 [cited  
663 2021 Feb 5];10:2020.12.21.20248640. Available from:  
664 <https://doi.org/10.1101/2020.12.21.20248640>
- 665 31. Liu Z, Zheng H, Lin H, Li M, Yuan R, Peng J, et al. Identification of Common  
666 Deletions in the Spike Protein of Severe Acute Respiratory Syndrome Coronavirus  
667 2. J Virol [Internet]. 2020 Jun 22 [cited 2021 Feb 5];94(17):790–810. Available  
668 from: <http://jvi.asm.org/>
- 669 32. Plante JA, Liu Y, Liu J, Xia H, Johnson BA, Lokugamage KG, et al. Spike  
670 mutation D614G alters SARS-CoV-2 fitness. Nature [Internet]. 2020 Oct 26 [cited

- 671 2021 Feb 5];1–6. Available from: <https://doi.org/10.1038/s41586-020-2895-3>
- 672 33. Volz E, Mishra S, Chand M, Barrett JC, Johnson R, Hopkins S, et al. Transmission  
673 of SARS-CoV-2 Lineage B.1.1.7 in England: Insights from linking  
674 epidemiological and genetic data. medRxiv [Internet]. 2021 Jan 4 [cited 2021 Feb  
675 5];2020.12.30.20249034. Available from:  
676 <https://www.medrxiv.org/content/10.1101/2020.12.30.20249034v2>
- 677 34. Jangra S, Ye C, Rathnasinghe R, Stadlbauer D, Krammer F, Simon V, et al. The  
678 E484K mutation in the SARS-CoV-2 spike protein reduces but does not abolish  
679 neutralizing activity of human convalescent and post-vaccination sera. medRxiv  
680 Prepr Serv Heal Sci [Internet]. 2021 Jan 29 [cited 2021 Feb  
681 4];2021.01.26.21250543. Available from:  
682 <http://www.ncbi.nlm.nih.gov/pubmed/33532796>
- 683 35. Wibmer CK, Ayres F, Hermanus T, Madzivhandila M, Kgagudi P, Lambson BE,  
684 et al. SARS-CoV-2 501Y.V2 escapes neutralization by South African COVID-19  
685 donor plasma. bioRxiv [Internet]. 2021 Jan 19 [cited 2021 Feb  
686 5];2021.01.18.427166. Available from: <https://doi.org/10.1101/2021.01.18.427166>
- 687 36. Gottlieb RL, Nirula A, Chen P, Boscia J, Heller B, Morris J, et al. Effect of  
688 Bamlanivimab as Monotherapy or in Combination With Etesevimab on Viral Load  
689 in Patients With Mild to Moderate COVID-19. JAMA [Internet]. 2021 Jan 21  
690 [cited 2021 Feb 5]; Available from:  
691 <https://jamanetwork.com/journals/jama/fullarticle/2775647>
- 692 37. Yang P, Gu H, Zhao Z, Wang W, Cao B, Lai C, et al. Angiotensin-converting  
693 enzyme 2 (ACE2) mediates influenza H7N9 virus-induced acute lung injury. Sci  
694 Rep [Internet]. 2014 Nov 13 [cited 2020 Nov 18];4(1):7027. Available from:  
695 [www.nature.com/scientificreports](http://www.nature.com/scientificreports)
- 696 38. Zou Z, Yan Y, Shu Y, Gao R, Sun Y, Li X, et al. Angiotensin-converting enzyme  
697 2 protects from lethal avian influenza A H5N1 infections. Nat Commun [Internet].  
698 2014 May 6 [cited 2020 Nov 18];5(1):1–7. Available from:  
699 [www.nature.com/naturecommunications](http://www.nature.com/naturecommunications)
- 700 39. Wang X, Khaidakov M, Ding Z, Mitra S, Lu J, Liu S, et al. Cross-talk between  
701 inflammation and angiotensin II: Studies based on direct transfection of  
702 cardiomyocytes with AT1R and AT2R cDNA. Exp Biol Med [Internet]. 2012 Dec  
703 [cited 2020 Nov 18];237(12):1394–401. Available from:  
704 <https://pubmed.ncbi.nlm.nih.gov/23354398/>
- 705 40. Sodhi CP, Wohlford-Lenane C, Yamaguchi Y, Prindle T, Fulton WB, Wang S, et  
706 al. Attenuation of pulmonary ACE2 activity impairs inactivation of des-arg9  
707 bradykinin/BKB1R axis and facilitates LPS-induced neutrophil infiltration. Am J  
708 Physiol - Lung Cell Mol Physiol [Internet]. 2018 Jan 1 [cited 2020 Nov  
709 18];314(1):L17–31. Available from: <https://pubmed.ncbi.nlm.nih.gov/28935640/>
- 710 41. Moore MJ, Dorfman T, Li W, Wong SK, Li Y, Kuhn JH, et al. Retroviruses



- 711 Pseudotyped with the Severe Acute Respiratory Syndrome Coronavirus Spike  
712 Protein Efficiently Infect Cells Expressing Angiotensin-Converting Enzyme 2. *J*  
713 *Virologica* [Internet]. 2004 Oct 1 [cited 2020 Aug 11];78(19):10628–35. Available  
714 from: <http://jvi.asm.org/>
- 715 42. Huang K, Lin M, Kuo T, Chen C, Lin C, Chou Y, et al. Humanized COVID- 19  
716 decoy antibody effectively blocks viral entry and prevents SARS- CoV- 2  
717 infection. *EMBO Mol Med* [Internet]. 2021 Jan 11 [cited 2021 Apr 4];13(1).  
718 Available from: <https://pubmed.ncbi.nlm.nih.gov/33159417/>
- 719 43. Iwanaga N, Cooper L, Rong L, Beddingfield B, Crabtree J, Tripp RA, et al. Novel  
720 ACE2-IgG1 fusions with improved in vitro and in vivo activity against SARS-  
721 CoV2. [cited 2021 Apr 6]; Available from:  
722 <https://doi.org/10.1101/2020.06.15.152157>
- 723 44. Patel SK, Juno JA, Lee WS, Wragg KM, Hogarth PM, Kent SJ, et al. Plasma  
724 ACE2 activity is persistently elevated following SARS-CoV-2 infection:  
725 implications for COVID-19 pathogenesis and consequences. *Eur Respir J*  
726 [Internet]. 2021 Jan 21 [cited 2021 Feb 5];2003730. Available from:  
727 <http://erj.ersjournals.com/lookup/doi/10.1183/13993003.03730-2020>
- 728 45. Ciulla MM. SARS-CoV-2 downregulation of ACE2 and pleiotropic effects of  
729 ACEIs/ARBs [Internet]. Vol. 43, *Hypertension Research*. Springer Nature; 2020  
730 [cited 2021 Feb 5]. p. 985–6. Available from: [https://doi.org/10.1038/s41440-020-](https://doi.org/10.1038/s41440-020-0488-z)  
731 [0488-z](https://doi.org/10.1038/s41440-020-0488-z)
- 732 46. Zhang P, Zhu L, Cai J, Lei F, Qin JJ, Xie J, et al. Association of Inpatient Use of  
733 Angiotensin-Converting Enzyme Inhibitors and Angiotensin II Receptor Blockers  
734 with Mortality among Patients with Hypertension Hospitalized with COVID-19.  
735 *Circ Res* [Internet]. 2020 Jun 5 [cited 2021 Feb 5];126(12):1671–81. Available  
736 from: <https://www.ahajournals.org/doi/suppl/10.1161/CIRCRESAHA.120.317134>.
- 737 47. Lu J, Sun P. High affinity binding of SARS-CoV-2 spike protein enhances ACE2  
738 carboxypeptidase activity. *bioRxiv Prepr Serv Biol* [Internet]. 2020 [cited 2021  
739 Feb 5]; Available from: [/pmc/articles/PMC7337377/?report=abstract](https://pmc/articles/PMC7337377/?report=abstract)
- 740 48. Mandelboim O, Malik P, Davis DM, Jo CH, Boyson JE, Strominger JL. Human  
741 CD16 as a lysis receptor mediating direct natural killer cell cytotoxicity. *Proc Natl*  
742 *Acad Sci U S A* [Internet]. 1999 May 11 [cited 2020 Nov 19];96(10):5640–4.  
743 Available from: [www.pnas.org](http://www.pnas.org).
- 744 49. Naldini L, Blömer U, Gallay P, Ory D, Mulligan R, Gage FH, et al. In vivo gene  
745 delivery and stable transduction of nondividing cells by a lentiviral vector. *Science*  
746 (80- ) [Internet]. 1996 Apr 12 [cited 2020 Nov 19];272(5259):263–7. Available  
747 from: <https://pubmed.ncbi.nlm.nih.gov/8602510/>

748

# Figure 1

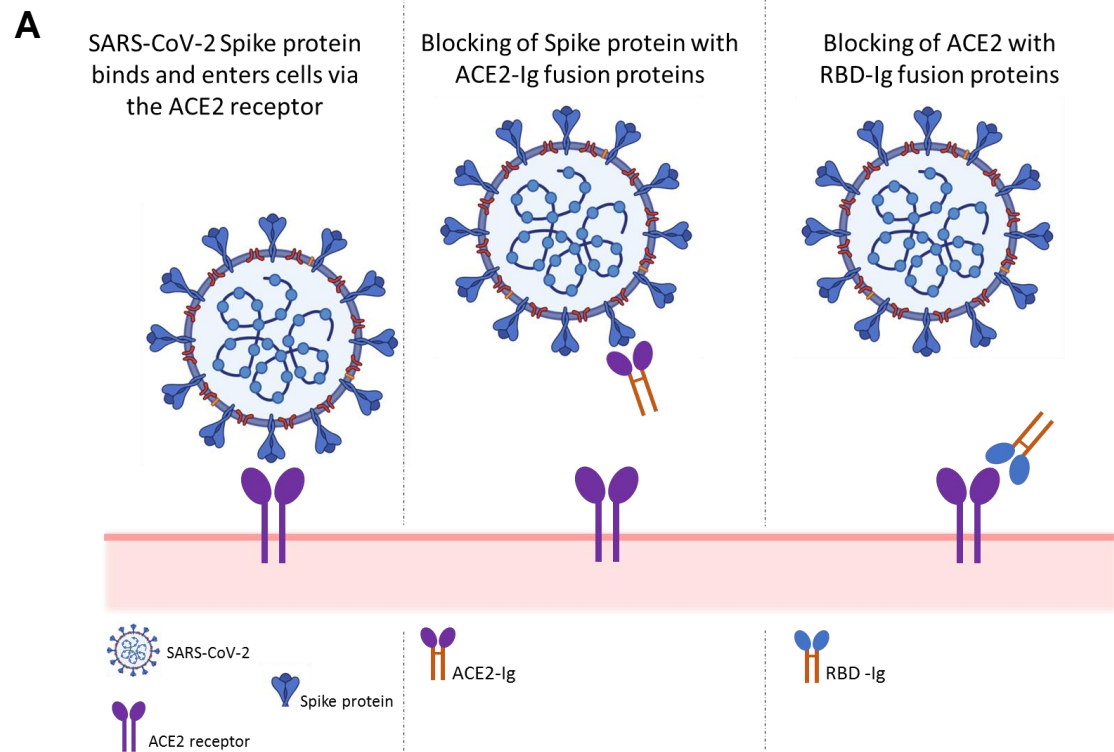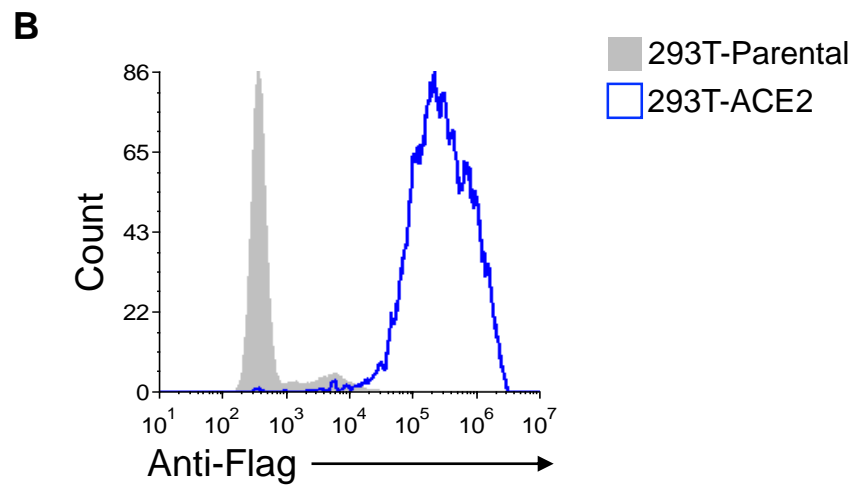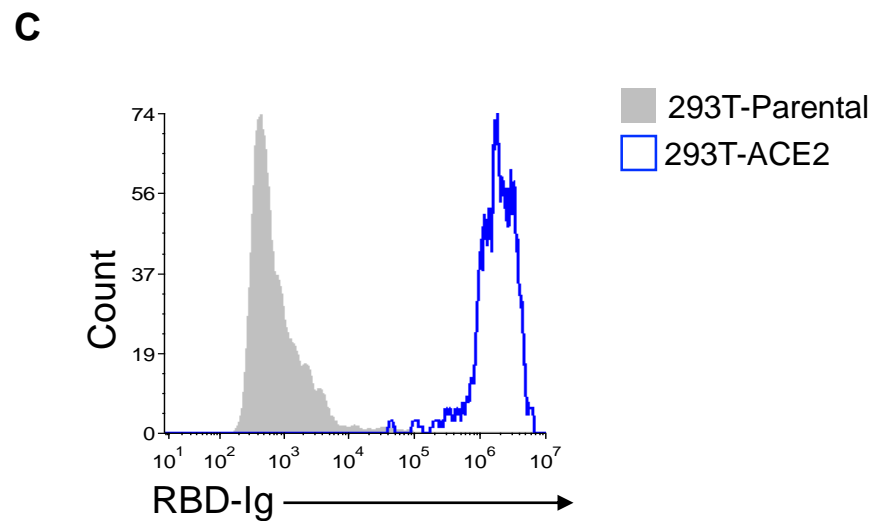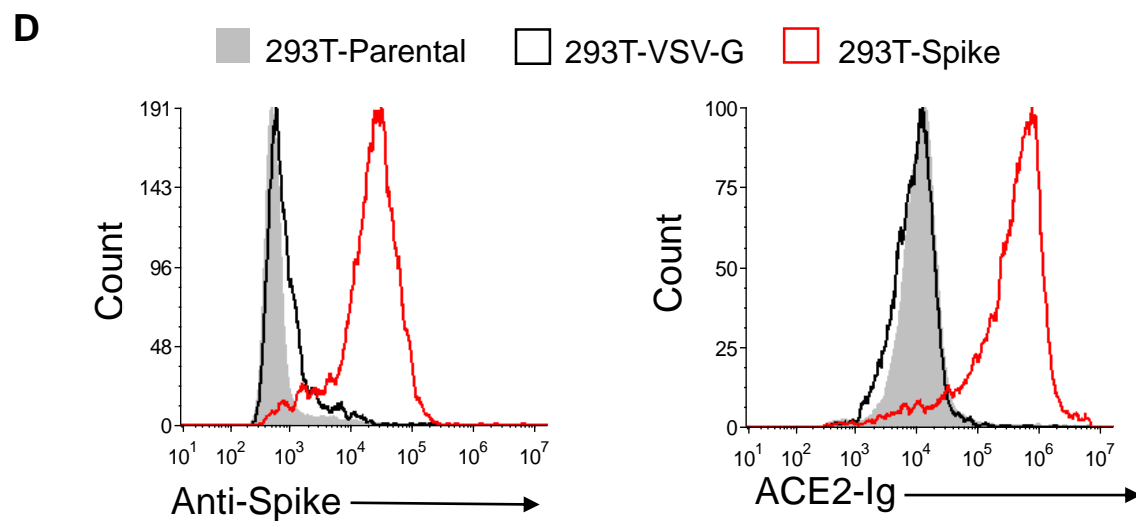



# Figure 2

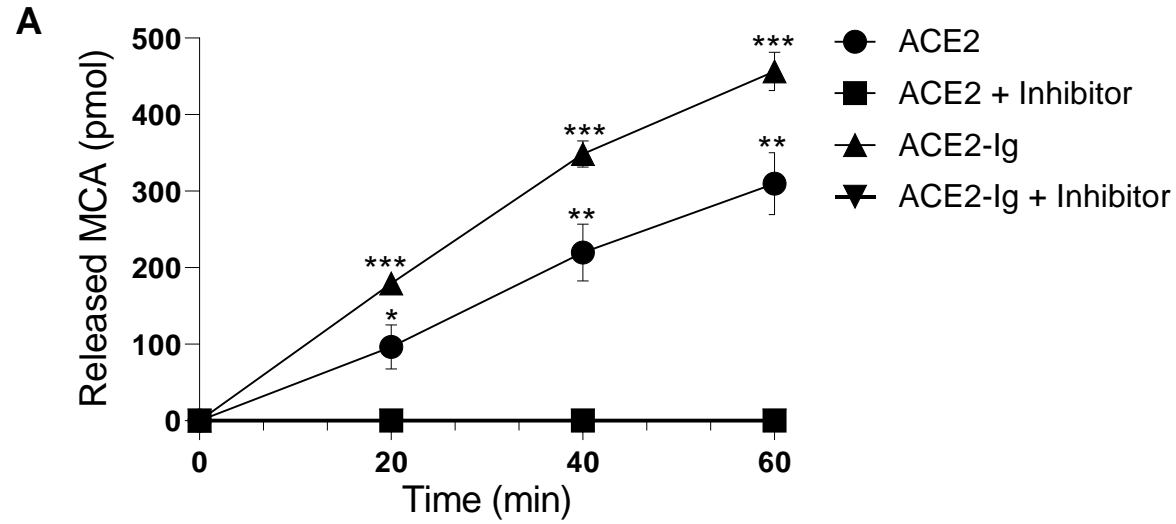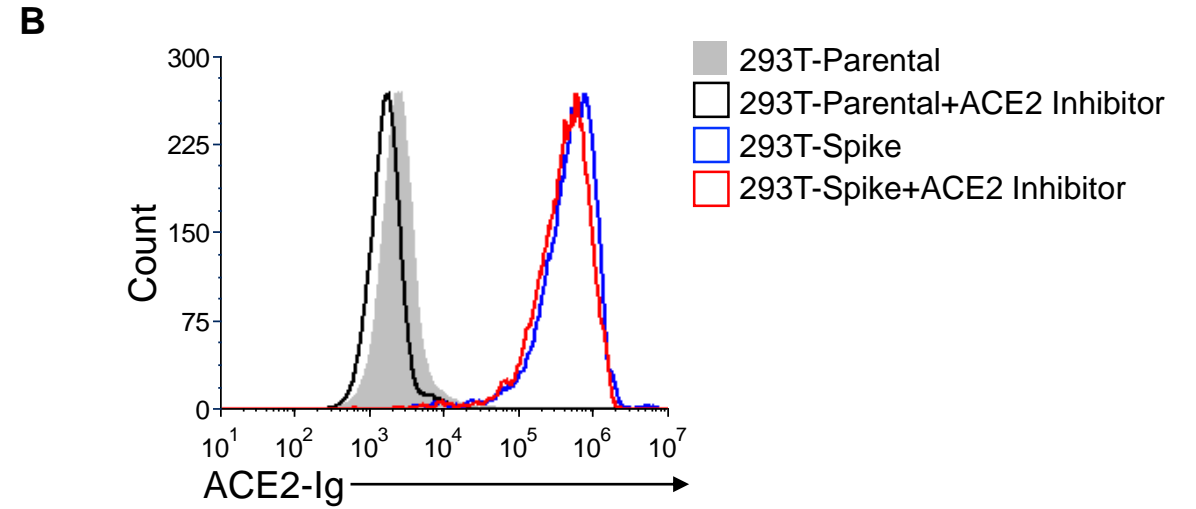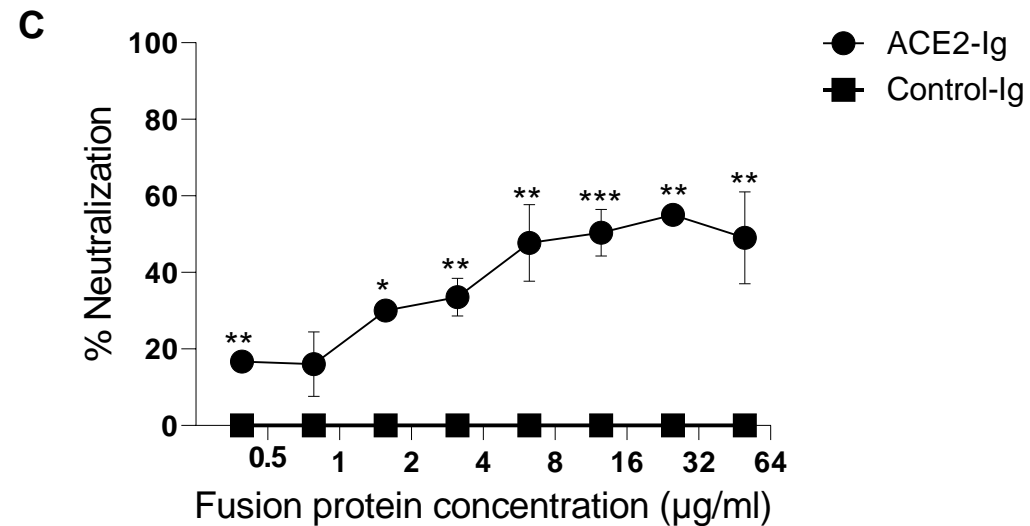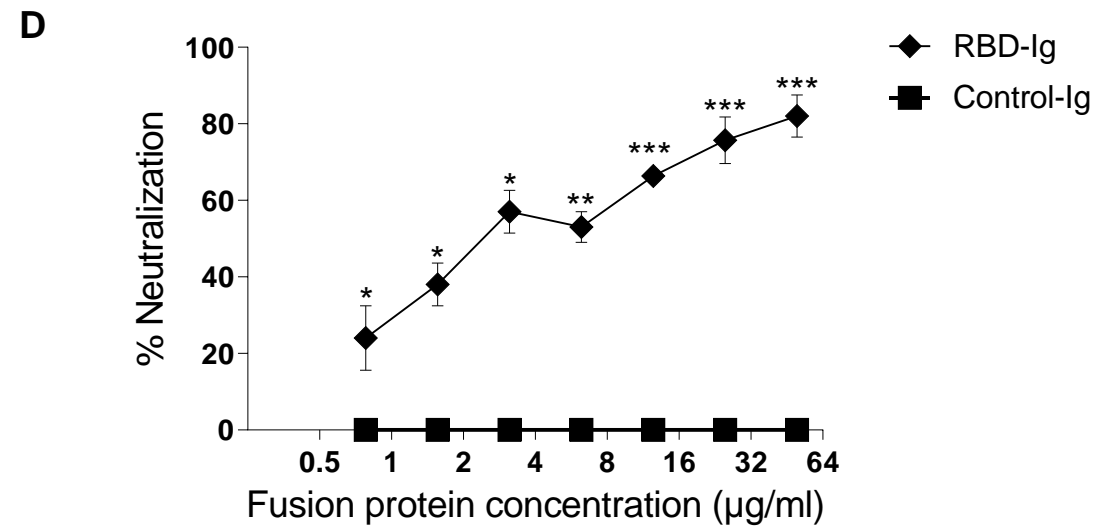

# Figure 3

**A**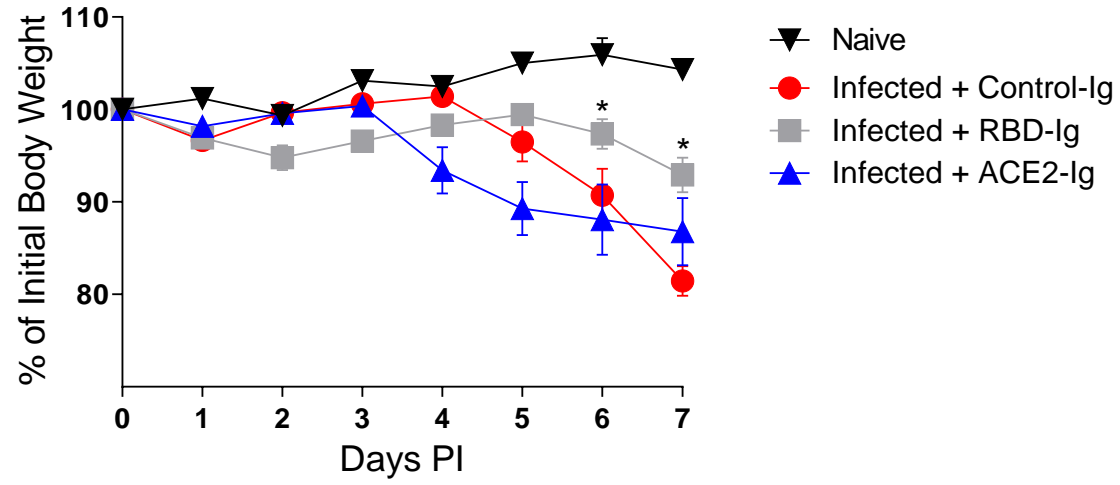**B**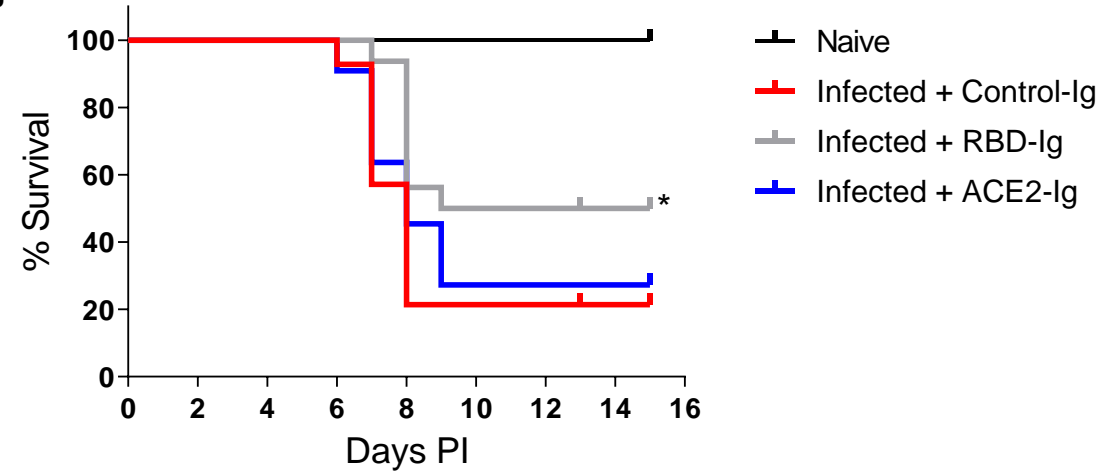

# Figure 4

A

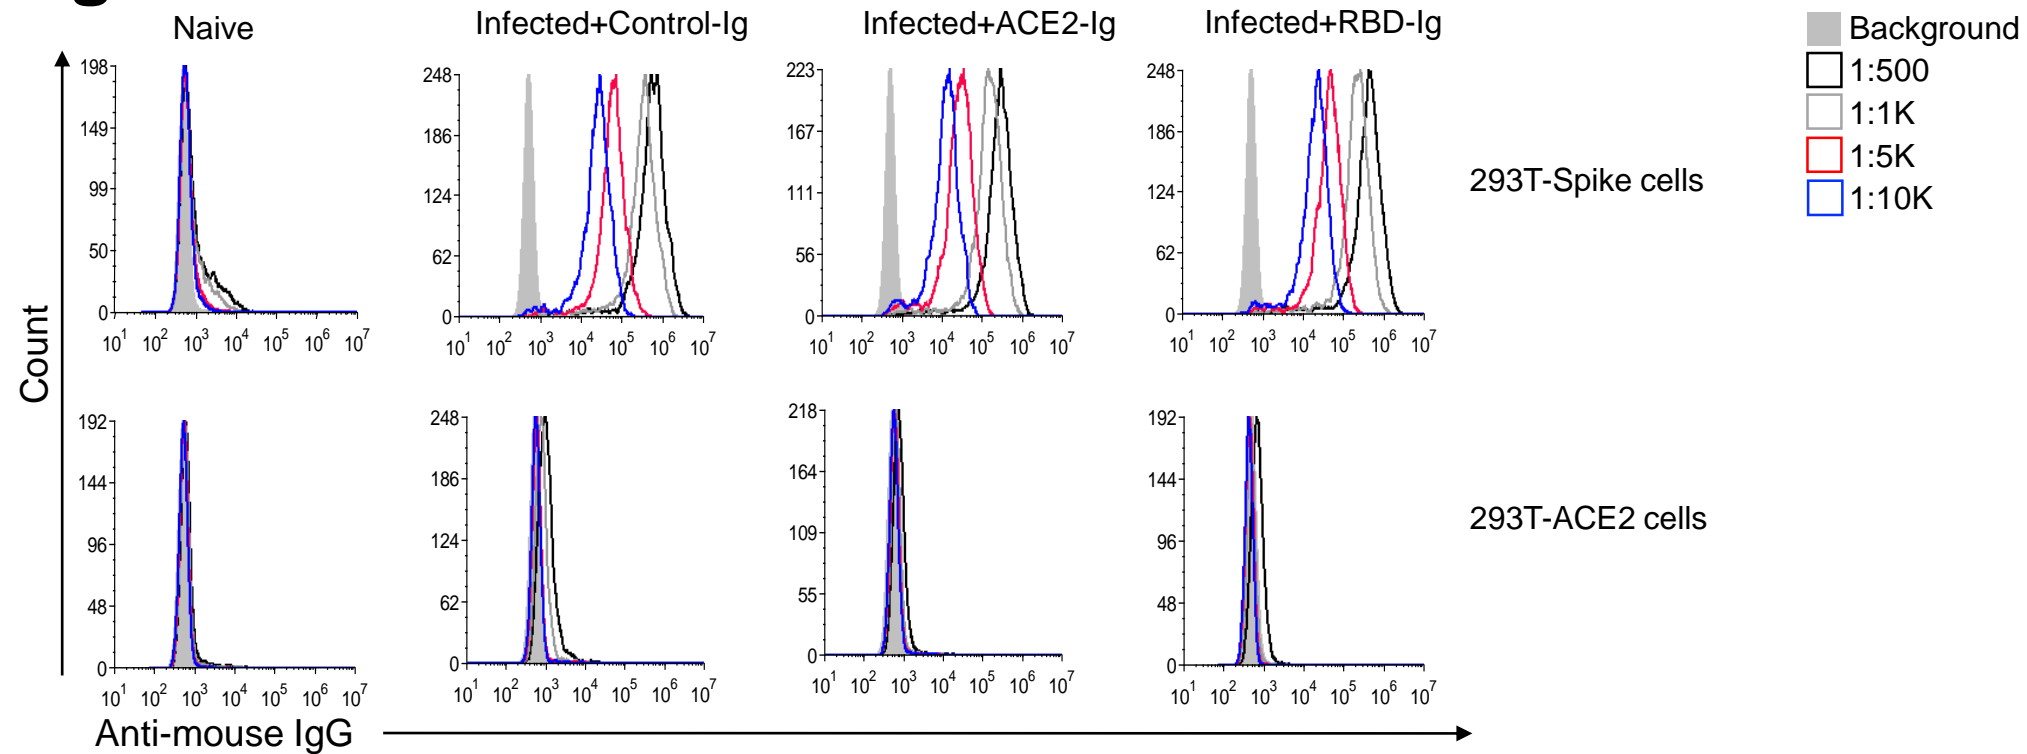

B

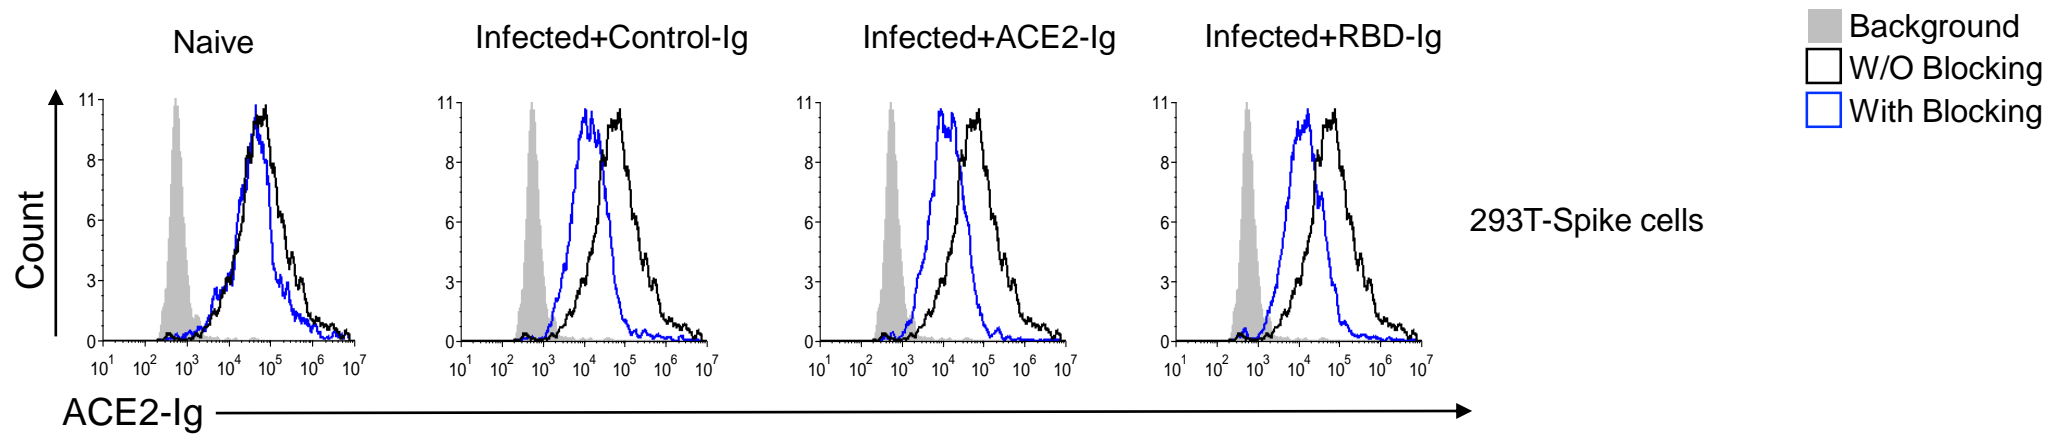

# Figure 5

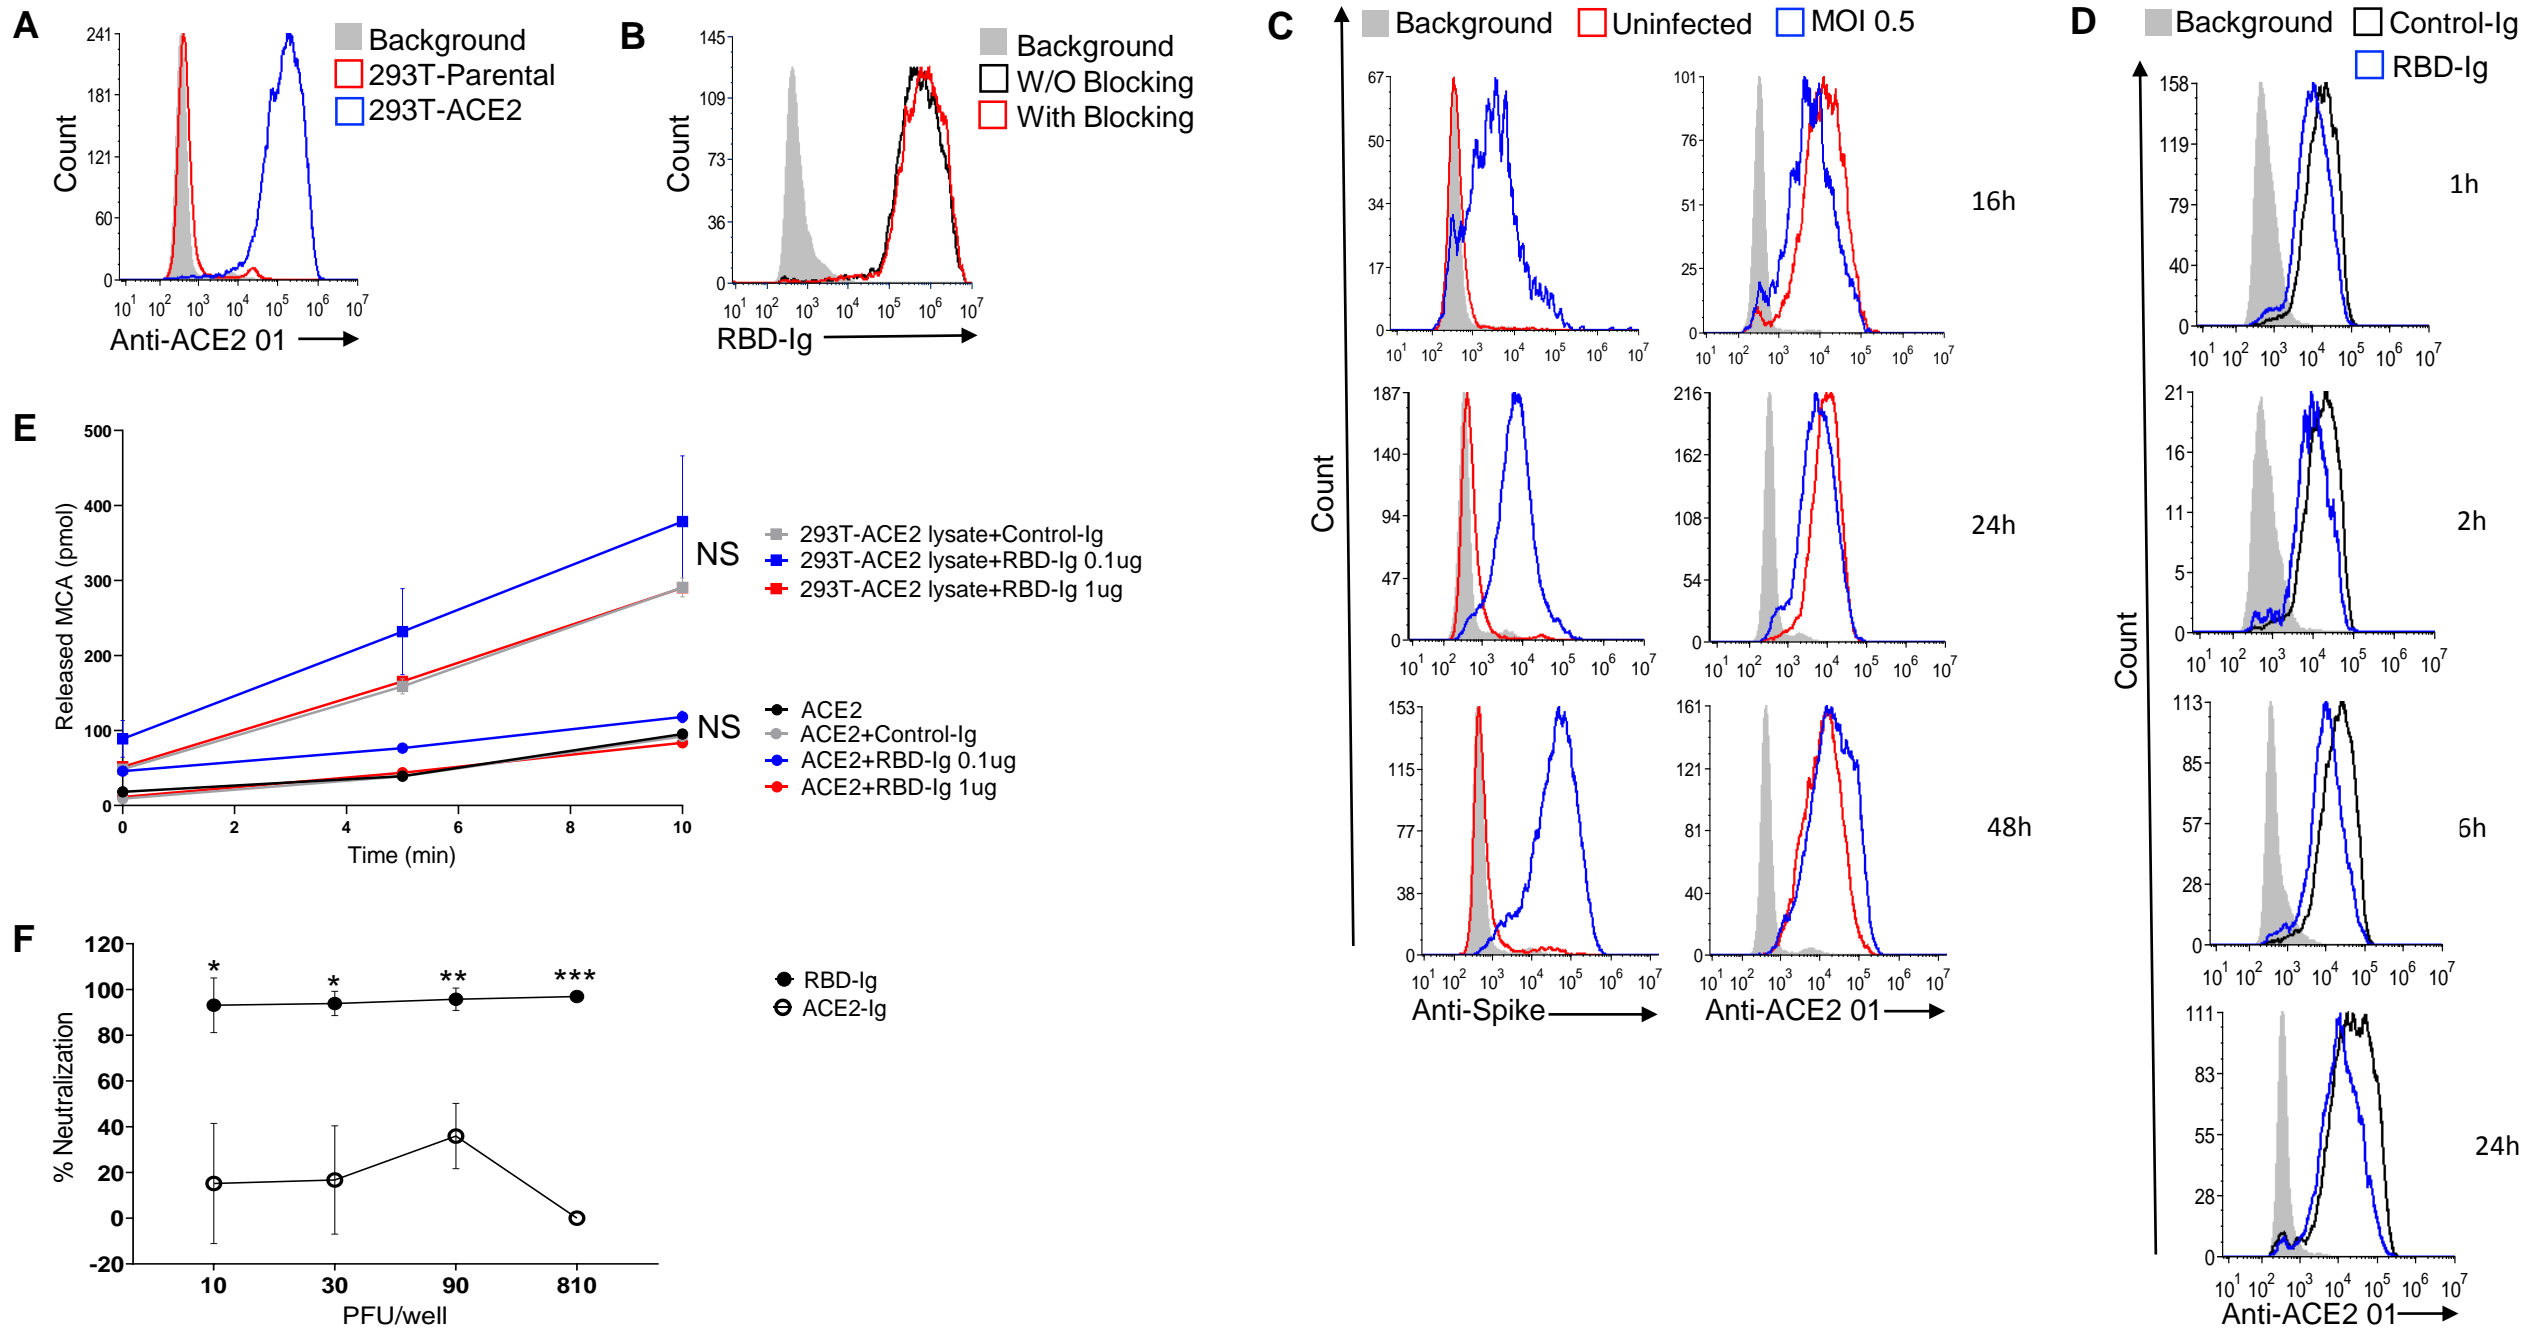

Source: https://biorxiv.org/content/10.1101/2021.04.18.440302v1.full.pdf
